# Supplementary material for: Digital Storytelling in Older Adults With Typical Aging, and With Mild Cognitive Impairment or Dementia: A Systematic Literature Review
Source: PubMed Central journal article supplement — J Appl Gerontol. 2021 May 19;41(3):867–80. doi: 10.1177/07334648211015456 (PMC8848055; doi:10.1177/07334648211015456), 2021-05-19
Supplement: sj-pdf-1-jag-10.1177_07334648211015456.pdf [file sj-pdf-1-jag-10.1177_07334648211015456.pdf]

## Supplemental Material

### Appendix A. Peer-reviewed Literature Search Strategy

**Table A.1**

| Database                                                                                                                            | Keywords (search string)                                                                                                                                                                                                                                                                                                                                                                                                                                                                                                                                                                                                                                                                                                                               | Results |
|-------------------------------------------------------------------------------------------------------------------------------------|--------------------------------------------------------------------------------------------------------------------------------------------------------------------------------------------------------------------------------------------------------------------------------------------------------------------------------------------------------------------------------------------------------------------------------------------------------------------------------------------------------------------------------------------------------------------------------------------------------------------------------------------------------------------------------------------------------------------------------------------------------|---------|
| MEDLINE(R) Epub Ahead of Print, In-Process & Other Non-Indexed Citations, OVID MEDLINE(R) Daily and OVID MEDLINE(R) 1946 to present | {SH (exp Aging/) OR aging or elder* or older adult* or older person* or seniors or senior citizen* or geriatric* or gerontology} AND {SH (exp Narration/) OR SH (Biography/) OR story* or stories or narrative* or autobiograph* or life stor* or life histor* or reminiscenc* or digital story* or digital stories or digital narrative*} AND {SH (exp Internet/) OR SH (exp Technology/) OR digital or media or mobile or "mobile application*" or online or internet or act or technology* or multimedia or hypermedia or "information technology" or "communication technology"}                                                                                                                                                                   | 444     |
| OVID Embase (OVID 1974 to present)                                                                                                  | {SH (exp Aging/) OR aging or elder* or older adult* or older person* or seniors or senior citizen* or geriatric* or gerontology} AND {SH (exp verbal communication/) OR SH (exp life history/) OR digital story* or digital stories or digital narrative* or stories or narrative* or autobiograph* or life stor* or life histor* or reminiscenc*} AND {SH (exp Internet/) OR SH (exp Technology/) OR SH (exp mobile application/) OR SH (exp multimedia/) OR SH (exp hypermedia/) OR digital or media or mobile or "mobile application*" or online or internet or act or technology* or multimedia or hypermedia or "information technology" or "communication technology"}                                                                           | 1320    |
| PsycINFO (1806 to present)                                                                                                          | {SH (exp Aging/) OR aging or elder* or older adult* or older person* or seniors or senior citizen* or geriatric* or gerontology} AND {SH (exp narratives/) OR SH (Biography) OR digital story* or digital stories or digital narrative* or stories or narrative* or autobiograph* or life stor* or life histor* or reminiscenc*} AND {SH (exp Internet/) OR SH (exp Technology/) OR SH (exp multimedia/) OR SH (exp hypermedia/) OR digital or media or mobile or "mobile application*" or online or internet or act or technology* or multimedia or hypermedia or "information technology" or "communication technology"}                                                                                                                             | 462     |
| CINAHL Plus with Full Text                                                                                                          | {MH ("Aging+") OR MH ("Aged+") OR MH ("Aged, 80 and Over") OR aging or elder* or older adult* or older person* or seniors or senior citizen* or geriatric* or gerontology} OR {MH ("Narratives") OR MH ("Biographies+") OR MH ("Life Histories") OR MH ("Storytelling+") OR digital story* or digital stories or digital narrative* or stories or narrative* or autobiograph* or life stor* or life histor* or reminiscenc*} AND {MH (exp Internet/) OR MH (exp Technology/) OR MH (exp mobile application/) OR MH (exp multimedia/) OR MH (exp hypermedia/) OR digital or media or mobile or "mobile application*" or online or internet or act or technology* or multimedia or hypermedia or "information technology" or "communication technology"} | 443     |
| Abstracts in Social Gerontology                                                                                                     | {aging or elder* or older adult* or older person* or seniors or senior citizen* or geriatric* or gerontology or aged} AND {digital stories or digital narrative* or stories or narrative* or autobiograph* or life stor* or life histor* or reminiscenc*} AND {digital or media or mobile or "mobile application*" or online or internet or act or technology* or multimedia or hypermedia or "information technology" or "communication technology"}                                                                                                                                                                                                                                                                                                  | 586     |
| ERIC via ESCOhost                                                                                                                   | {aging or elder* or older adult* or older person* or seniors or senior citizen* or geriatric* or gerontology or aged} AND {digital stories or digital narrative* or stories or narrative* or autobiograph* or life stor* or life histor* or reminiscenc*} AND {digital or media or mobile or "mobile application*" or online or internet or act or technology* or multimedia or hypermedia or "information technology" or "communication technology"}                                                                                                                                                                                                                                                                                                  | 559     |
| Web of Science Core Collection                                                                                                      | {aging or elder* or older adult* or older person* or seniors or senior citizen* or geriatric* or gerontology or aged} AND {digital stories or digital narrative* or stories or narrative* or autobiograph* or life stor* or life histor* or reminiscenc*}                                                                                                                                                                                                                                                                                                                                                                                                                                                                                              | 228     |

|        |                                                                                                                                                                                                                                                                                                                                                                                                                                                       |     |
|--------|-------------------------------------------------------------------------------------------------------------------------------------------------------------------------------------------------------------------------------------------------------------------------------------------------------------------------------------------------------------------------------------------------------------------------------------------------------|-----|
|        | AND {digital or media or mobile or "mobile application*" or online or internet or act or technology* or multimedia or hypermedia or "information technology" or "communication technology"}                                                                                                                                                                                                                                                           |     |
| Scopus | {aging or elder* or older adult* or older person* or seniors or senior citizen* or geriatric* or gerontology or aged} AND {digital stories or digital narrative* or stories or narrative* or autobiograph* or life stor* or life histor* or reminiscenc*} AND {digital or media or mobile or "mobile application*" or online or internet or act or technology* or multimedia or hypermedia or "information technology" or "communication technology"} | 506 |

## Appendix B. Additional Tables

Table. B.1. Variables operationalization

| Dimension                                  | Variables name             | Definition                                                                                                                              | Operationalization                                                                                                                            |
|--------------------------------------------|----------------------------|-----------------------------------------------------------------------------------------------------------------------------------------|-----------------------------------------------------------------------------------------------------------------------------------------------|
| Bibliometric indicators of the publication | Type of publication        | Whether the study was published in a peer review journal, conference or thesis                                                          | 1=Journal<br>2=Conference proceedings                                                                                                         |
|                                            | SNIP/SCOPUS                | Source Normalized Impact per Paper (SNIP) is a metric that intrinsically accounts for field-specific differences in citation practices. | A number between 0, $\infty$                                                                                                                  |
|                                            | Q                          | Refer to journal ranking quartiles within a subdiscipline using the SJR citation index                                                  | 1= Q1<br>2= Q2<br>3= Q3<br>4= Q4                                                                                                              |
|                                            | Year of publication        | Year in which the study was published                                                                                                   | A number between 1995-2019                                                                                                                    |
|                                            | Country (ISO Code)         | Countries of all authors (affiliation) of the paper                                                                                     | AUS, CAN, CHN, COL, DNK, ESP, FRA, GBR, GER, GRC, IRL, ITA, JOR, KOR, MLT, NLD, NZL, POL, PRT, SWE, TWN, USA                                  |
| Population or participants (older adults)  | Sample Clients (n)         | Number of clients involved in the study                                                                                                 | A number between 0, n                                                                                                                         |
|                                            | Cohorts                    | Only report if multiple Cohorts                                                                                                         |                                                                                                                                               |
|                                            | Age, clients               | Mean age and standard deviation of the clients participating in the study                                                               | Mean $\pm$ Standard deviation                                                                                                                 |
|                                            | Sex- Clients               | Sex of the clients participating in the study                                                                                           | 1= Female = nn (%)<br>2= Male = mm (%)<br>3= Other = zz (%)<br>NR (Not Reported)<br>N/A (Not applicable)                                      |
|                                            | Medical condition, clients | The medical condition the client has on the moment the study was conducted                                                              | 1= Dementia (DEM)<br>2= Mild Cognitive Impairment (MCI)<br>3= Alzheimer's (AD)<br>4= Other<br>NR (Not Reported)<br>N/A (Not applicable)       |
|                                            | Dementia severity          | The severity of the dementia or cognitive impairment                                                                                    | 1=Early stage,<br>2=Midstate,<br>3=Advanced stage<br>NR (Not Reported)<br>N/A (Not applicable)                                                |
| Other participants Involved in the process | Video editing              | Who did the video editing process? (Researchers, family, caregivers, other)"                                                            | 1=Researchers<br>2=Participants (Edited their own)<br>3=Family (Specify)<br>4=Students<br>5=Professionals (Facilitators, Media professionals) |

|             |              |                                                            |                                                                                                                                                                                                                                                                   |
|-------------|--------------|------------------------------------------------------------|-------------------------------------------------------------------------------------------------------------------------------------------------------------------------------------------------------------------------------------------------------------------|
|             |              |                                                            | 6= Other (Specify)<br>NR (Not Reported)<br>N/A (Not applicable)                                                                                                                                                                                                   |
|             | Training     | Was previous training in the editing process required? Y/N | 1= Yes<br>2= No<br>NR (Not Reported)<br>N/A (Not applicable)                                                                                                                                                                                                      |
|             | Training     | Who trained the Editor?                                    | 1= Researchers<br>2= Facilitators<br>3= 3rd Party Company<br>4= Other<br>NR (Not Reported)<br>N/A (Not applicable)                                                                                                                                                |
|             | Recipients   | Who were the recipients/observers of the stories           | 1= General public<br>2= Therapists<br>3= Family (spouse, children, parents) friends<br>4= Formal carers<br>5= University students<br>6= Community volunteers<br>7= Other Participants Private<br>NR (Not Reported)<br>N/A (Not applicable)                        |
|             | Sharing      | Methods for sharing stories/"Transmission method           | 1= Online (Social media, Blog, Archive, YouTube, Etc.)<br>2= Public Viewing<br>3= Private (Just Participant &/or selected individuals)<br>4= Conferences<br>5= Interactive Display<br>6= Ambient Display<br>7= Other<br>NR (Not Reported)<br>N/A (Not applicable) |
| The stories | The creation | How did they create the story /how the process was         | 1=One-one<br>2=Workshops<br>3= Participatory design method<br>4= Technology facilitation<br>5= Community programs courses<br>6= other (describe)"<br>NR (Not Reported)<br>N/A (Not applicable)                                                                    |
|             | Settings     | Setting where the digital storytelling is done             | 1=Participants Home<br>2=Community Centres<br>3= Public Spaces (Park, Coffee shop)                                                                                                                                                                                |

|                |                       |                                                                                                  |                                                                                                                                                                                                                          |
|----------------|-----------------------|--------------------------------------------------------------------------------------------------|--------------------------------------------------------------------------------------------------------------------------------------------------------------------------------------------------------------------------|
|                |                       |                                                                                                  | 4= LTC<br>5= Other (Specify)<br>NR (Not Reported)<br>N/A (Not applicable)                                                                                                                                                |
|                | Creation time         | How long it takes to create the stories (WEEKS)                                                  | A number between 0, $\infty$                                                                                                                                                                                             |
|                | Evaluation time       | How long it takes to assess the impact of the stories (Period following Story Creation), (WEEKS) | A number between 0, $\infty$                                                                                                                                                                                             |
|                | Live events           | Life events recalled or logged                                                                   | 1=Past events<br>2=Current events<br>3=Future<br>4= Other (Specify)<br>NR (Not Reported)<br>N/A (Not applicable)                                                                                                         |
|                | Media content         |                                                                                                  | 1=Person,<br>2=General,<br>3=Era<br>4= Other (Specify)<br>NR (Not Reported)<br>N/A (Not applicable)                                                                                                                      |
|                | Media                 | Type of media in which the story is delivered                                                    | 1=Photos,<br>2= Videos,<br>3=Music,<br>4=Sound,<br>5=Text,<br>6= Voice<br>7=Recordings,<br>8=Images,<br>9=Blogs,<br>10=Other<br>NR (Not Reported)<br>N/A (Not applicable)                                                |
| The technology | Aim of the technology |                                                                                                  | 1=Content Capture (CC)<br>2=Story Editing (SE)- Includes story creation<br>3=Story Sharing (SS)<br>4=Story Viewing (SV)- Ex. display, DVD player, etc.<br>5=Other (Specify)<br>NR (Not Reported)<br>N/A (Not applicable) |
|                | TRL                   | Level of technology readiness                                                                    | A number between 1-9                                                                                                                                                                                                     |
|                | Proprietary           | Use of Proprietary Technology/ Technology Application?                                           | 1= Yes<br>2= No<br>NR (Not Reported)<br>N/A (Not applicable)                                                                                                                                                             |
| Study Design   | Study type            | Not applicable                                                                                   | 1= Clinical-oriented studies                                                                                                                                                                                             |

|                   |                           |                                                                    |                                                                                                                                                                                                                                     |
|-------------------|---------------------------|--------------------------------------------------------------------|-------------------------------------------------------------------------------------------------------------------------------------------------------------------------------------------------------------------------------------|
|                   |                           |                                                                    | 2= Usability (Focused on determining how usable a product/intervention is)<br>3=Design (Developing a technology)<br>4=Descriptive (e.g., includes products, application)<br>NR (Not Reported)<br>N/A (Not applicable)               |
|                   | Design type (Mixed study) | Strategy of inquiry                                                | 1= Yes<br>2= No                                                                                                                                                                                                                     |
|                   | Design type (specific)    | Quantitative. According to McMaster assessment of study appraisal. | 1= RCT,<br>2=Cohort Design,<br>3= Single case design,<br>4=Pre-test Post-Test,<br>5=Case control,<br>6=Cross Sectional Design,<br>7=Case study design,<br>8=Observational.<br>9=Others<br>NR (Not Reported)<br>N/A (Not applicable) |
|                   | Design type (specific)    | Qualitative. According to McMaster assessment of study appraisal.  | 1=Ethnography,<br>2=Phenomenology,<br>3=Grounded theory,<br>4=Participatory action research,<br>5=Others.<br>NR (Not Reported)<br>N/A (Not applicable)                                                                              |
| Study Overview    | Study Overview            | Study Overview                                                     | One sentence summarizing the objective of the study<br>NR (Not Reported)<br>N/A (Not applicable)                                                                                                                                    |
| Outcome variables | Outcome variables         | Name Outcome variables                                             | Outcome variables<br>NR (Not Reported)<br>N/A (Not applicable)                                                                                                                                                                      |

**Table B.2. Levels of evidence. Modified Sackett criteria (Teasell, et al., 2020)**

| Level of evidence | Description                                                                                                                                                                                                                                                                                                                                                                                                                                                                                                                         |
|-------------------|-------------------------------------------------------------------------------------------------------------------------------------------------------------------------------------------------------------------------------------------------------------------------------------------------------------------------------------------------------------------------------------------------------------------------------------------------------------------------------------------------------------------------------------|
| Level 1a          | More than one randomized controlled trial with PEDro scores $\geq 6$ . Includes within subject's comparison with randomized conditions and cross-over designs                                                                                                                                                                                                                                                                                                                                                                       |
| Level 1b          | One randomized controlled trial with a PEDro score $\geq 6$ . Includes within subject's comparison with randomized conditions and cross-over designs.                                                                                                                                                                                                                                                                                                                                                                               |
| Level 2           | Randomized controlled trial, PEDro score $< 6$ ; Non-RCTS and Cohort studies (using at least 2 similar groups with one exposed to a particular condition).                                                                                                                                                                                                                                                                                                                                                                          |
| Level 3           | Case-Control: A retrospective study comparing conditions, including historical controls.                                                                                                                                                                                                                                                                                                                                                                                                                                            |
| Level 4           | Case Series, retrospective chart review; Pre-Post, a prospective trial with a baseline measure, intervention, and a post-test using a single group of subjects; or Post-Study, a prospective post-test with two or more groups, intervention, then post-test using a single group of subjects                                                                                                                                                                                                                                       |
| Level 5           | Observational, studies using cross-sectional analysis to interpret relations; Clinical Consensus, expert opinion without explicit critical appraisal, or based on physiology, biomechanics or "first principles"; or Case Report, pre-post or case studies (n=1).                                                                                                                                                                                                                                                                   |
| Conflicting       | In the absence of evidence, agreement by a group of experts on the appropriate treatment course. Consensus opinion is regarded as the lowest form of evidence. As such, it is arguably not considered evidence at all. Disagreement between the findings of at least 2 RCTs or where RCTs are not available. Where there are more than 4 RCTs and the results of only one was conflicting, the conclusion was based on the results of the majority of the studies, unless the study with conflicting results was of higher quality. |
